# Supplementary material for: Nutritional omega-3 modulates neuronal morphology in the prefrontal cortex along with depression-related behaviour through corticosterone secretion
Source: PubMed Central journal article supplement — Transl Psychiatry. 2014 Sep 9;4(9):e437–. doi: 10.1038/tp.2014.77 (PMC4203007; doi:10.1038/tp.2014.77), 2014-09-09
Supplement: tp201477x5.pdf [file tp201477x5.pdf]

1  
2  
3  
4  
5  
6  
7  
8  
9  
10  
11  
12  
13  
14  
15  
16  
17  
18  
19  
20  
21  
22  
23  
24  
25  
26  
27  
28  
29  
30  
31

## SUPPLEMENTARY FIGURES

### **Nutritional omega-3 modulates neuronal morphology in prefrontal cortex along with depression-related behaviour through corticosterone secretion**

Thomas Larrieu <sup>1,2</sup>, Muna L Hilal <sup>3,4</sup>, Célia Fourrier <sup>1,2</sup>, Véronique De Smedt-Peyrusse <sup>1,2</sup>, Nathalie Sans <sup>3,4</sup>, Lucile Capuron <sup>1,2</sup> and Sophie Layé <sup>1,2\*</sup>

<sup>1</sup> INRA, Nutrition et Neurobiologie Intégrée, UMR 1286, 33076 Bordeaux, France

<sup>2</sup> Univ. Bordeaux, Nutrition et Neurobiologie intégrée, UMR 1286, 33076 Bordeaux, France

<sup>3</sup> INSERM, Neurocentre Magendie, UMR 862, 33077 Bordeaux, France

<sup>4</sup> Univ. Bordeaux, Neurocentre Magendie, UMR 862, 33077 Bordeaux, France

\*Corresponding author: Sophie Layé, PhD  
Nutrition et Neurobiologie Intégrative, NutriNeuro, INRA UMR 1286  
Bâtiment UFR pharmacie, 2e tranche, 2e étage, case courrier 34,  
Université Victor Ségalen, 146 rue Léo Saignat, 33076, Bordeaux, France  
E-mail : sophie.laye@bordeaux.inra.fr

1 **Supplementary Fig. 1 Morphometric analysis in 3D of Golgi Cox-stained**  
2 **pyramidal neurons.** Representative brain regions, microphotography (x20) of  
3 pyramidal neurons in layer II/III of the dIPFC (top) and dmPFC (bottom) and  
4 representative tracing by the NeuroLucida software of apical dendritic tree of  
5 pyramidal neurons.

6 **Supplementary Fig. 2 Complexity of basal dendritic pyramidal neurons is not**  
7 **impaired in the PFC of n-3 deficient or defeated mice.** Analysis of basal dendritic  
8 intersections was performed on total dendritic tree in the dorsal m dIPFC of control  
9 diet and n-3 deficient mice. There was no significant difference in basal dendritic  
10 arborisation in any of the groups. (interaction:  $F_{1,57} = 0.4507$ ,  $p > 0.05$ , diet effect:  
11  $F_{1,57} = 1.729$ ,  $p > 0.05$ , stress effect:  $F_{1,57} = 0.2305$ ,  $p > 0.05$ , Two-way ANOVA,  $n =$   
12 15 neurons per group). Data are expressed as mean  $\pm$  s.e.m.

13 **Supplementary Fig. 3 Dendritic arborisation correlates with the correspondent**  
14 **corticosterone plasma level.** Pearson's correlations were calculated considering  
15 corticosterone plasma levels x number of total apical intersections in the PFC of  
16 control diet and n-3 deficient mice under conditions of no stress (undefeated) or  
17 following 10 days of social defeat (defeated). Negative correlations were observed  
18 between plasma corticosterone levels and dendritic complexity in both (a) the dIPFC  
19 ( $r = -0.6821$ ;  $p = 0.01$ ) and (b) the dmPFC ( $r = -0.5968$ ;  $p < 0.05$ ).

20 **Supplementary Fig. 4 No effect of adrenalectomy in control diet mice. (a)**  
21 **Experimental timeline.** Control diet mice (2 month-old) were bilaterally  
22 adrenalectomised (Adx) or sham-operated. Adx mice were provided low dose  
23 (25 $\mu$ g/ml) of corticosterone for 4 weeks before behavioural measurements. (b) Adx  
24 treatment had no effect on social behaviour ( $t_9 = 1.294$ ,  $p > 0.05$ , unpaired  $t$  test,  $n =$

1 5-6 per group), (c) on anxiety-like behaviour ( $t_9 = 1.829$ ,  $p > 0.05$ , unpaired  $t$  test,  $n =$   
2 5-6 per group), on (d,e) neuronal arborisation in both the PFC (dIPFC:  $t_{36} = 1.571$ ,  $p$   
3  $> 0.05$ , unpaired  $t$  test,  $n = 19$  neurons per group; dmPFC:  $t_{49} = 0.9961$ ,  $p > 0.05$ ,  
4 unpaired  $t$  test,  $n = 25$  neurons per group), and (f) on corticosterone levels ( $t_9 =$   
5  $1.437$ ,  $p > 0.05$ , unpaired  $t$  test,  $n = 5-6$  per group). Data are displayed as mean  $\pm$   
6 s.e.m.
