# Supplementary material for: Nutritional omega-3 modulates neuronal morphology in the prefrontal cortex along with depression-related behaviour through corticosterone secretion
Source: PubMed Central journal article supplement — Transl Psychiatry. 2014 Sep 9;4(9):e437–. doi: 10.1038/tp.2014.77 (PMC4203007; doi:10.1038/tp.2014.77), 2014-09-09
Supplement: tp201477x6.pdf [file tp201477x6.pdf]

**Table 1.** Composition of the diets (g/kg diet)

| Ingredient               | Amount |
|--------------------------|--------|
| Casein                   | 180    |
| Cornstarch               | 460    |
| Sucrose                  | 230    |
| Cellulose                | 20     |
| Fat <sup>1</sup>         | 50     |
| Mineral mix <sup>2</sup> | 50     |
| Vitamin mix <sup>3</sup> | 10     |

<sup>1</sup>: for detailed composition, see Table 2

<sup>2</sup>: composition (g/kg): sucrose, 110.7; CaCO<sub>3</sub>, 240; K<sub>2</sub>HPO<sub>4</sub>, 215; CaHPO<sub>4</sub>, 215; MgSO<sub>4</sub>·7H<sub>2</sub>O, 100; NaCl, 60; MgO, 40; FeSO<sub>4</sub>·7H<sub>2</sub>O, 8; ZnSO<sub>4</sub>·7H<sub>2</sub>O, 7; MnSO<sub>4</sub>·H<sub>2</sub>O, 2; CuSO<sub>4</sub>·5H<sub>2</sub>O, 1; Na<sub>2</sub>SiO<sub>7</sub>·3H<sub>2</sub>O, 0.5; AlK(SO<sub>4</sub>)<sub>2</sub>·12H<sub>2</sub>O, 0.2; K<sub>2</sub>CrO<sub>4</sub>, 0.15; NaF, 0.1; NiSO<sub>4</sub>·6H<sub>2</sub>O, 0.1; H<sub>2</sub>BO<sub>3</sub>, 0.1; CoSO<sub>4</sub>·7H<sub>2</sub>O, 0.05; KIO<sub>3</sub>, 0.04; (NH<sub>4</sub>)<sub>6</sub>Mo<sub>7</sub>O<sub>24</sub>·4H<sub>2</sub>O, 0.02; LiCl, 0.015; Na<sub>2</sub>SeO<sub>3</sub>, 0.015; NH<sub>4</sub>VO<sub>3</sub>, 0.01

<sup>3</sup>: composition (g/kg): sucrose, 549.45; retinyl acetate, 1; cholecalciferol, 0.25; DL- $\alpha$ -tocopheryl acetate, 20; phylloquinone, 0.1; thiamin HCl, 1; riboflavin, 1; nicotinic acid,

5; calcium pantothenate, 2.5; pyridoxine HCl, 1; biotin, 1; folic acid, 0.2; cyanobalamin, 2.5; choline HCl, 200; DL-methionin, 200; p-aminobenzoic acid, 5; inositol, 10
