# Supplementary material for: Nutritional omega-3 modulates neuronal morphology in the prefrontal cortex along with depression-related behaviour through corticosterone secretion
Source: PubMed Central journal article supplement — Transl Psychiatry. 2014 Sep 9;4(9):e437–. doi: 10.1038/tp.2014.77 (PMC4203007; doi:10.1038/tp.2014.77), 2014-09-09
Supplement: tp201477x7.pdf [file tp201477x7.pdf]

**Table 2.** Fatty acid composition of the dietary lipids (% wt of total fatty acids)

| Diet                             | Control     | n-3 deficient | n-3 supplemented |
|----------------------------------|-------------|---------------|------------------|
| 16:0                             | 22.6        | 7.3           | 20.7             |
| 18:0                             | 3.3         | 4.1           | 3.6              |
| Other saturated FAs              | 1.8         | 1.6           | 5.9              |
| <b>Total saturated FAs</b>       | <b>27.7</b> | <b>13.0</b>   | <b>30.2</b>      |
| 16:1 n-7                         | 0.2         | 0.2           | 5.3              |
| 18:1 n-9                         | 57.9        | 28.1          | 22.6             |
| 18:1 n-7                         | 1.5         | 0.9           | 4.9              |
| Other monounsaturated FAs        | 0.4         | 0.2           | 1.3              |
| <b>Total monounsaturated FAs</b> | <b>60.0</b> | <b>29.4</b>   | <b>34.1</b>      |
| 18:2 n-6 (LA)                    | 10.6        | 57.4          | 15.1             |
| 20:4 n-6 (AA)                    | ND          | ND            | 0.6              |
| <b>Total n-6 PUFAs</b>           | <b>10.7</b> | <b>57.4</b>   | <b>15.7</b>      |
| 18:3 n-3 (ALA)                   | 1.6         | 0.2           | 1.1              |
| 18:4 n-3                         | ND          | ND            | 2.1              |
| 20:5 n-3                         | ND          | ND            | 10.3             |
| 22:5 n-3                         | ND          | ND            | 0.7              |
| 22:6 n-3                         | ND          | ND            | 5.8              |
| <b>Total n-3 PUFAs</b>           | <b>1.6</b>  | <b>0.2</b>    | <b>20.0</b>      |
| <b>Total PUFAs</b>               | <b>12.3</b> | <b>57.6</b>   | <b>35.7</b>      |
| <b>n-6/n-3 PUFAs</b>             | <b>6.69</b> | <b>287</b>    | <b>0.79</b>      |

FAs, fatty acids; AA, arachidonic acid; PUFAs, polyunsaturated fatty acids; ALA,  $\alpha$ -linolenic acid; ND, not detected (under the limit for the detection by gas chromatography, <0.05%).
